# Supplementary material
Source: PubMed Central journal article supplement (PMC5897618)
Supplement: rsbl20180083supp1.pdf [file rsbl20180083supp1.pdf]

1 Electronic Supplementary Material for the manuscript “Urban blackbirds have shorter  
2 telomeres” by J.D. Ibáñez-Álamo, J. Pineda-Pampliega, R.L. Thomson, J.I. Aguirre, A.  
3 Díez-Fernández, B. Faivre, J. Figuerola and S. Verhulst. 2018. *Biology Letters*  
4 20180083.

5

6

7 Figure S1. Geographical distribution of the study dyads: Granada (1), Seville (2),  
8 Madrid (3), Dijon (4), Turku (5). For each dyad, samples were collected from an urban  
9 and a forest area separated by an average of  $29.8 \pm 3.8$  km, which is an order of  
10 magnitude greater than the mean adult and natal dispersal distance of blackbirds [1].

11

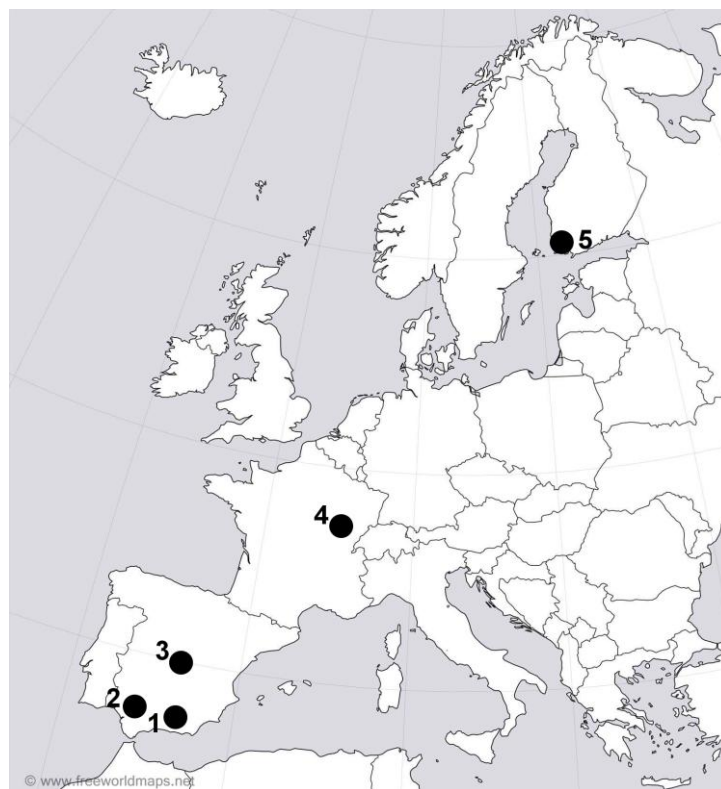

12

13

14

15

16

17 Figure S2. Telomere length of yearling blackbirds in urban and forest habitats at each of  
18 the five dyads. Box plots show the median, upper and lower quartiles, maximum and  
19 minimum values, and outliers. Numbers within box plots represent sample sizes.

20

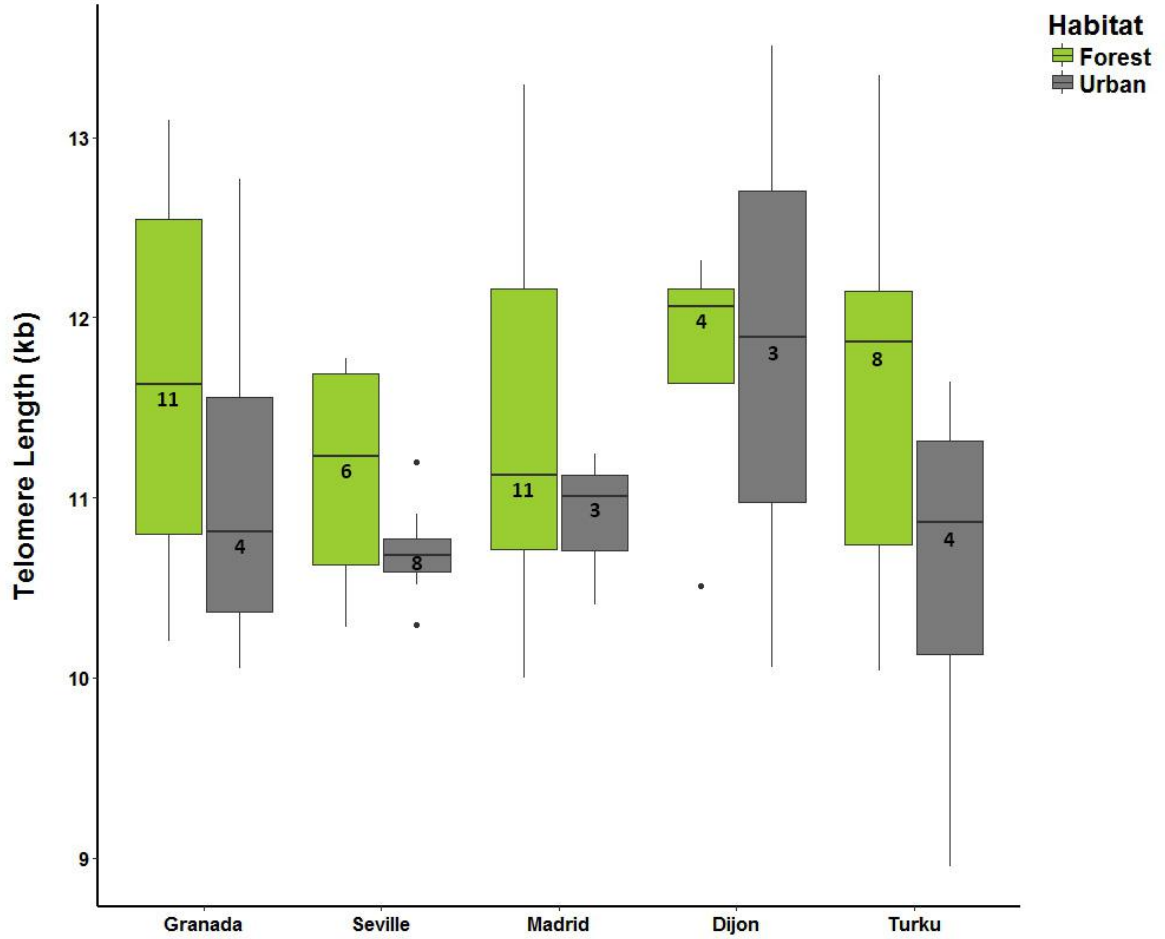

21

22

23

24

25

26

27 Figure S3. Telomere length of old adult blackbirds ( $\geq 2$  years old) for locations studied.

28 The box plots show the median, upper and lower quartiles, maximum and minimum

29 values. Numbers within box plots represent sample sizes.

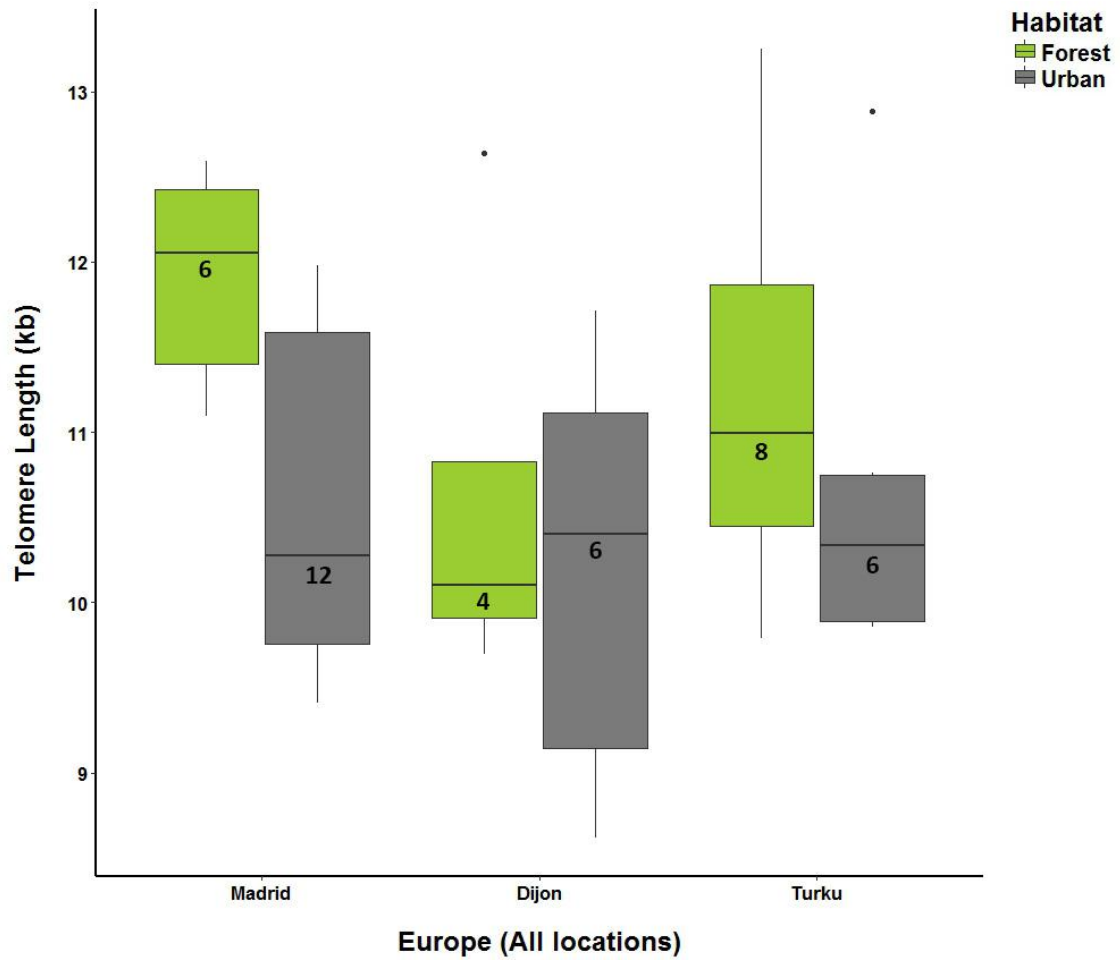

30

31

32

33

34

35

36

37

38

39 Table S1. Habitat characteristics of capture locations. Negative values of the PC1 (urbanization score) indicate urban locations while positive  
 40 values correspond with natural sites according to [2].

| <b>Dyad</b> | <b>Habitat</b> | <b>Coordinates</b>                    | <b>Sampling dates</b> | <b>Mean building density score</b> | <b>Cells with high building density</b> | <b>Cells with roads</b> | <b>Mean vegetation density score</b> | <b>Cells with high vegetation density</b> | <b>Urbanization score (PC1)</b> |
|-------------|----------------|---------------------------------------|-----------------------|------------------------------------|-----------------------------------------|-------------------------|--------------------------------------|-------------------------------------------|---------------------------------|
| Granada     | Urban          | 37° 10' 38.41" N<br>3° 35' 54.805" W  | 12 Mar – 27 Mar       | 1.45                               | 50                                      | 96                      | 1.05                                 | 13                                        | -3.15                           |
|             | Forest         | 37° 9' 4.471" N<br>3° 24' 22.133" W   | 06 Apr – 24 Apr       | 0.10                               | 0                                       | 8                       | 2.00                                 | 100                                       | 2.06                            |
| Seville     | Urban          | 37° 23' 20.731" N<br>5° 59' 4.052" W  | 30 Mar – 15 May       | 0.85                               | 12                                      | 93                      | 1.25                                 | 29                                        | -1.27                           |
|             | Forest         | 37° 19' 39.868" N<br>6° 14' 38.594" W | 17 Apr – 12 Jun       | 0.29                               | 5                                       | 29                      | 1.91                                 | 91                                        | 1.38                            |
| Madrid      | Urban          | 40° 25' 0.39" N<br>3° 42' 13.644" W   | 27 Apr – 05 May       | 0.92                               | 25                                      | 99                      | 1.46                                 | 47                                        | -1.30                           |
|             | Forest         | 40° 45' 3.859" N<br>3° 48' 36.011" W  | 05 May – 17 May       | 0.07                               | 0                                       | 0                       | 2.00                                 | 100                                       | 2.16                            |
| Dijon       | Urban          | 47° 19' 19.369" N<br>5° 2' 29.328" E  | 28 May – 04 Jun       | 1.19                               | 21                                      | 99                      | 1.04                                 | 7                                         | -2.31                           |
|             | Forest         | 47° 10' 9.185" N<br>5° 26' 10.529" E  | 25 May – 03 Jun       | 0.00                               | 0                                       | 12                      | 1.99                                 | 99                                        | 2.08                            |
| Turku       | Urban          | 60° 27' 6.527" N<br>22° 15' 59.868" E | 07 Jun – 15 Jun       | 1.06                               | 11                                      | 99                      | 1.12                                 | 15                                        | -1.78                           |
|             | Forest         | 60° 41' 8.585" N<br>22° 22' 18.523" E | 16 Jun – 01 Jul       | 0.08                               | 0                                       | 0                       | 1.99                                 | 99                                        | 2.13                            |

41

42

43

44 Table S2. General Linear Mixed Model exploring habitat differences (urban vs forest)  
 45 in telomere length of yearling blackbirds. P-values smaller than 0.05 are shown in  
 46 italics.

|                        | <b>Estimate</b> | <b>SE</b> | <b>df</b>       | <b>F</b> | <b>P</b>    |
|------------------------|-----------------|-----------|-----------------|----------|-------------|
| <b>AVERAGE</b>         |                 |           |                 |          |             |
| <b>Intercept</b>       | 11551           | 295       |                 |          |             |
| <b>Habitat (Urban)</b> | -547            | 224       | 1, 56.9         | 5.94     | <i>0.02</i> |
| <b>Rejected terms</b>  |                 |           |                 |          |             |
| <b>Sex (Male)</b>      | -285            | 215       | 1, 57.0         | 1.75     | 0.19        |
| <b>Sex x Habitat</b>   | 469             | 448       | 1, 56.0         | 1.09     | 0.30        |
| <b>Random factor</b>   |                 |           | <b>Variance</b> |          |             |
| <b>Gel</b>             |                 |           | 268873          |          |             |
| <b>Dyad</b>            |                 |           | 3260            |          |             |
| <b>Location:Dyad</b>   |                 |           | 0               |          |             |
| <b>Residuals</b>       |                 |           | 702739          |          |             |

47

48

49

50

51 Table S3. General Linear Mixed Model exploring habitat differences (urban vs forest)  
 52 in telomere length of old male blackbirds ( $\geq 2$  years old). P-values smaller than 0.05 are  
 53 shown in italics.

|                        | <b>Estimate</b> | <b>SE</b> | <b>df</b>       | <b>F</b> | <b>P</b>     |
|------------------------|-----------------|-----------|-----------------|----------|--------------|
| <b>AVERAGE</b>         |                 |           |                 |          |              |
| <b>Intercept</b>       | 11359           | 361       |                 |          |              |
| <b>Habitat (Urban)</b> | -922            | 332       | 1, 47.0         | 7.73     | <i>0.008</i> |
| <b>Random factor</b>   |                 |           | <b>Variance</b> |          |              |
| <b>Gel</b>             |                 |           | 136592          |          |              |
| <b>Dyad</b>            |                 |           | 0               |          |              |
| <b>Location:Dyad</b>   |                 |           | 0               |          |              |
| <b>Residuals</b>       |                 |           | 1116365         |          |              |

54

55

56

57 Table S4. Generalized Linear Mixed Model exploring habitat differences (urban vs  
 58 forest) in blackbird's age ratio (individuals of  $\geq 2$  years old). P-values smaller than 0.05  
 59 are shown in italics. N = 263.

|                        | <b>Estimate</b> | <b>SE</b>       | <b>Z</b>    | <b>P</b>      |
|------------------------|-----------------|-----------------|-------------|---------------|
| <b>AGE RATIO</b>       |                 |                 |             |               |
| <b>Intercept</b>       | 0.2787          | 0.1771          |             |               |
| <b>Habitat (Urban)</b> | <i>0.9548</i>   | <i>0.2728</i>   | <i>3.50</i> | <i>0.0005</i> |
| <b>Rejected terms</b>  |                 |                 |             |               |
| <b>Sex (Male)</b>      | 0.1567          | 0.2724          | 0.58        | 0.57          |
| <b>Sex x Habitat</b>   | 0.4474          | 0.5506          | 0.81        | 0.42          |
| <b>Random factor</b>   |                 | <b>Variance</b> |             |               |
| <b>Dyad</b>            |                 | 1.222e-15       |             |               |
| <b>Location:Dyad</b>   |                 | 0               |             |               |

60  
 61  
 62  
 63  
 64  
 65  
 66  
 67  
 68  
 69  
 70  
 71  
 72  
 73  
 74  
 75  
 76

77 **References**

- 78 1. Paradis E, Baillie SR, Sutherland WJ, Gregory RD. 1998 Patterns of natal and  
79 breeding dispersal in birds. *J. Anim. Ecol.* **67**, 518–536. (doi:10.1046/j.1365-  
80 2656.1998.00215.x)
- 81 2. Liker A, Papp Z, Bókony V, Lendvai ÁZ. 2008 Lean birds in the city: Body size  
82 and condition of house sparrows along the urbanization gradient. *J. Anim. Ecol.*  
83 **77**, 789–795. (doi:10.1111/j.1365-2656.2008.01402.x)
- 84
