# Supplementary material
Source: PubMed Central journal article supplement (PMC5897618)
Supplement: rsbl20180083supp2.pdf [file rsbl20180083supp2.pdf]

**Telomeres yearlings**

| Population | Dyad      | Habitat | Sex    | Gel_ID | Telomere_Length_bp |
|------------|-----------|---------|--------|--------|--------------------|
|            | 1 Granada | Forest  | Female | 1      | 13097              |
|            | 1 Granada | Forest  | Female | 3      | 11344              |
|            | 1 Granada | Forest  | Female | 3      | 12435              |
|            | 1 Granada | Forest  | Male   | 1      | 11691              |
|            | 1 Granada | Forest  | Male   | 1      | 12661              |
|            | 1 Granada | Forest  | Male   | 2      | 10637              |
|            | 1 Granada | Forest  | Male   | 2      | 10538              |
|            | 1 Granada | Forest  | Male   | 3      | 12881              |
|            | 1 Granada | Forest  | Male   | 3      | 11631              |
|            | 1 Granada | Forest  | Male   | 4      | 10963              |
|            | 1 Granada | Forest  | Male   | 4      | 10205              |
|            | 2 Granada | Urban   | Female | 1      | 12771              |
|            | 2 Granada | Urban   | Female | 2      | 10054              |
|            | 2 Granada | Urban   | Male   | 2      | 10474              |
|            | 2 Granada | Urban   | Male   | 4      | 11154              |
|            | 3 Seville | Urban   | Female | 1      | 10911              |
|            | 3 Seville | Urban   | Female | 2      | 10294              |
|            | 3 Seville | Urban   | Female | 2      | 10672              |
|            | 3 Seville | Urban   | Female | 2      | 10693              |
|            | 3 Seville | Urban   | Female | 3      | 10614              |
|            | 3 Seville | Urban   | Male   | 1      | 11199              |
|            | 3 Seville | Urban   | Male   | 3      | 10518              |
|            | 3 Seville | Urban   | Male   | 3      | 10729              |
|            | 4 Seville | Forest  | Female | 1      | 11777              |
|            | 4 Seville | Forest  | Female | 2      | 10280              |
|            | 4 Seville | Forest  | Female | 3      | 10985              |
|            | 4 Seville | Forest  | Male   | 1      | 11763              |
|            | 4 Seville | Forest  | Male   | 3      | 10509              |
|            | 4 Seville | Forest  | Male   | 3      | 11473              |
|            | 5 Madrid  | Forest  | Female | 1      | 13021              |
|            | 5 Madrid  | Forest  | Female | 1      | 10808              |
|            | 5 Madrid  | Forest  | Female | 2      | 11127              |
|            | 5 Madrid  | Forest  | Female | 2      | 11840              |
|            | 5 Madrid  | Forest  | Female | 3      | 10836              |
|            | 5 Madrid  | Forest  | Female | 4      | 11990              |
|            | 5 Madrid  | Forest  | Female | 4      | 10624              |
|            | 5 Madrid  | Forest  | Male   | 2      | 12331              |
|            | 5 Madrid  | Forest  | Male   | 2      | 10000              |
|            | 5 Madrid  | Forest  | Male   | 2      | 10094              |
|            | 5 Madrid  | Forest  | Male   | 3      | 13295              |
|            | 6 Madrid  | Urban   | Female | 1      | 11244              |
|            | 6 Madrid  | Urban   | Male   | 2      | 11006              |
|            | 6 Madrid  | Urban   | Male   | 3      | 10403              |
|            | 7 Dijon   | Forest  | Female | 2      | 10511              |
|            | 7 Dijon   | Forest  | Female | 3      | 12110              |
|            | 7 Dijon   | Forest  | Female | 4      | 12013              |
|            | 7 Dijon   | Forest  | Male   | 1      | 12320              |
|            | 8 Dijon   | Urban   | Female | 1      | 11891              |

|    |       |        |        |   |       |
|----|-------|--------|--------|---|-------|
| 8  | Dijon | Urban  | Female | 2 | 10059 |
| 8  | Dijon | Urban  | Female | 4 | 13511 |
| 9  | Turku | Urban  | Female | 3 | 11640 |
| 9  | Turku | Urban  | Male   | 1 | 10526 |
| 9  | Turku | Urban  | Male   | 2 | 8955  |
| 9  | Turku | Urban  | Male   | 3 | 11208 |
| 10 | Turku | Forest | Female | 1 | 12780 |
| 10 | Turku | Forest | Female | 3 | 11934 |
| 10 | Turku | Forest | Male   | 1 | 13348 |
| 10 | Turku | Forest | Male   | 2 | 10649 |
| 10 | Turku | Forest | Male   | 2 | 11843 |
| 10 | Turku | Forest | Male   | 3 | 11885 |
| 10 | Turku | Forest | Male   | 3 | 10037 |
| 10 | Turku | Forest | Male   | 3 | 10768 |

**Telomeres older birds**

| Population | Dyad     | Habitat | Sex  | Gel_ID | Telomere_Length_bp |
|------------|----------|---------|------|--------|--------------------|
|            | 5 Madrid | Forest  | Male | 1      | 11273              |
|            | 5 Madrid | Forest  | Male | 1      | 12453              |
|            | 5 Madrid | Forest  | Male | 2      | 12591              |
|            | 5 Madrid | Forest  | Male | 1      | 11772              |
|            | 5 Madrid | Forest  | Male | 1      | 12334              |
|            | 5 Madrid | Forest  | Male | 2      | 11092              |
|            | 6 Madrid | Urban   | Male | 1      | 9589               |
|            | 6 Madrid | Urban   | Male | 1      | 10153              |
|            | 6 Madrid | Urban   | Male | 2      | 9524               |
|            | 6 Madrid | Urban   | Male | 2      | 11581              |
|            | 6 Madrid | Urban   | Male | 2      | 11613              |
|            | 6 Madrid | Urban   | Male | 2      | 11716              |
|            | 6 Madrid | Urban   | Male | 1      | 10404              |
|            | 6 Madrid | Urban   | Male | 1      | 9811               |
|            | 6 Madrid | Urban   | Male | 2      | 11981              |
|            | 6 Madrid | Urban   | Male | 2      | 10503              |
|            | 6 Madrid | Urban   | Male | 2      | 9811               |
|            | 6 Madrid | Urban   | Male | 2      | 9412               |
|            | 7 Dijon  | Forest  | Male | 1      | 9982               |
|            | 7 Dijon  | Forest  | Male | 2      | 9696               |
|            | 7 Dijon  | Forest  | Male | 1      | 10225              |
|            | 7 Dijon  | Forest  | Male | 2      | 12637              |
|            | 8 Dijon  | Urban   | Male | 1      | 11711              |
|            | 8 Dijon  | Urban   | Male | 1      | 11051              |
|            | 8 Dijon  | Urban   | Male | 2      | 11133              |
|            | 8 Dijon  | Urban   | Male | 1      | 8942               |
|            | 8 Dijon  | Urban   | Male | 1      | 8621               |
|            | 8 Dijon  | Urban   | Male | 2      | 9758               |
|            | 9 Turku  | Urban   | Male | 1      | 10763              |
|            | 9 Turku  | Urban   | Male | 2      | 9955               |
|            | 9 Turku  | Urban   | Male | 2      | 9872               |
|            | 9 Turku  | Urban   | Male | 1      | 10711              |
|            | 9 Turku  | Urban   | Male | 2      | 12887              |
|            | 9 Turku  | Urban   | Male | 2      | 9858               |
|            | 10 Turku | Forest  | Male | 1      | 11334              |
|            | 10 Turku | Forest  | Male | 1      | 10661              |
|            | 10 Turku | Forest  | Male | 2      | 10552              |
|            | 10 Turku | Forest  | Male | 2      | 13253              |
|            | 10 Turku | Forest  | Male | 1      | 9792               |
|            | 10 Turku | Forest  | Male | 1      | 10144              |
|            | 10 Turku | Forest  | Male | 2      | 12603              |
|            | 10 Turku | Forest  | Male | 2      | 11624              |



|   |         |        |        |   |
|---|---------|--------|--------|---|
| 2 | Granada | Urban  | Male   | 6 |
| 2 | Granada | Urban  | Male   | 6 |
| 2 | Granada | Urban  | Male   | 6 |
| 2 | Granada | Urban  | Male   | 6 |
| 2 | Granada | Urban  | Male   | 6 |
| 2 | Granada | Urban  | Male   | 6 |
| 2 | Granada | Urban  | Male   | 6 |
| 2 | Granada | Urban  | Male   | 6 |
| 2 | Granada | Urban  | Male   | 6 |
| 2 | Granada | Urban  | Male   | 6 |
| 2 | Granada | Urban  | Male   | 6 |
| 3 | Seville | Urban  | Female | 5 |
| 3 | Seville | Urban  | Female | 5 |
| 3 | Seville | Urban  | Female | 5 |
| 3 | Seville | Urban  | Female | 5 |
| 3 | Seville | Urban  | Female | 5 |
| 3 | Seville | Urban  | Female | 6 |
| 3 | Seville | Urban  | Female | 6 |
| 3 | Seville | Urban  | Female | 6 |
| 3 | Seville | Urban  | Female | 6 |
| 3 | Seville | Urban  | Female | 6 |
| 3 | Seville | Urban  | Female | 6 |
| 3 | Seville | Urban  | Female | 6 |
| 3 | Seville | Urban  | Female | 6 |
| 3 | Seville | Urban  | Female | 6 |
| 3 | Seville | Urban  | Female | 6 |
| 3 | Seville | Urban  | Male   | 5 |
| 3 | Seville | Urban  | Male   | 5 |
| 3 | Seville | Urban  | Male   | 6 |
| 3 | Seville | Urban  | Male   | 6 |
| 3 | Seville | Urban  | Male   | 6 |
| 3 | Seville | Urban  | Male   | 6 |
| 4 | Seville | Forest | Female | 5 |
| 4 | Seville | Forest | Female | 5 |
| 4 | Seville | Forest | Female | 5 |
| 4 | Seville | Forest | Female | 5 |
| 4 | Seville | Forest | Female | 6 |
| 4 | Seville | Forest | Female | 6 |
| 4 | Seville | Forest | Female | 6 |
| 4 | Seville | Forest | Female | 6 |
| 4 | Seville | Forest | Female | 6 |
| 4 | Seville | Forest | Female | 6 |
| 4 | Seville | Forest | Female | 6 |
| 4 | Seville | Forest | Female | 6 |
| 4 | Seville | Forest | Female | 6 |
| 4 | Seville | Forest | Female | 6 |
| 4 | Seville | Forest | Male   | 5 |
| 4 | Seville | Forest | Male   | 5 |
| 4 | Seville | Forest | Male   | 5 |
| 4 | Seville | Forest | Male   | 5 |
| 4 | Seville | Forest | Male   | 5 |
| 4 | Seville | Forest | Male   | 5 |
| 4 | Seville | Forest | Male   | 5 |
| 4 | Seville | Forest | Male   | 5 |
| 4 | Seville | Forest | Male   | 5 |
| 4 | Seville | Forest | Male   | 6 |
| 4 | Seville | Forest | Male   | 6 |
| 4 | Seville | Forest | Male   | 6 |





|    |       |        |        |   |
|----|-------|--------|--------|---|
| 8  | Dijon | Urban  | Male   | 6 |
| 9  | Turku | Urban  | Female | 5 |
| 9  | Turku | Urban  | Female | 6 |
| 9  | Turku | Urban  | Female | 6 |
| 9  | Turku | Urban  | Female | 6 |
| 9  | Turku | Urban  | Female | 6 |
| 9  | Turku | Urban  | Female | 6 |
| 9  | Turku | Urban  | Female | 6 |
| 9  | Turku | Urban  | Female | 6 |
| 9  | Turku | Urban  | Female | 6 |
| 9  | Turku | Urban  | Female | 6 |
| 9  | Turku | Urban  | Female | 6 |
| 9  | Turku | Urban  | Female | 6 |
| 9  | Turku | Urban  | Female | 6 |
| 9  | Turku | Urban  | Female | 6 |
| 9  | Turku | Urban  | Female | 6 |
| 9  | Turku | Urban  | Female | 6 |
| 9  | Turku | Urban  | Male   | 5 |
| 9  | Turku | Urban  | Male   | 5 |
| 9  | Turku | Urban  | Male   | 5 |
| 9  | Turku | Urban  | Male   | 5 |
| 9  | Turku | Urban  | Male   | 5 |
| 9  | Turku | Urban  | Male   | 5 |
| 9  | Turku | Urban  | Male   | 5 |
| 9  | Turku | Urban  | Male   | 6 |
| 9  | Turku | Urban  | Male   | 6 |
| 9  | Turku | Urban  | Male   | 6 |
| 9  | Turku | Urban  | Male   | 6 |
| 9  | Turku | Urban  | Male   | 6 |
| 9  | Turku | Urban  | Male   | 6 |
| 9  | Turku | Urban  | Male   | 6 |
| 9  | Turku | Urban  | Male   | 6 |
| 9  | Turku | Urban  | Male   | 6 |
| 9  | Turku | Urban  | Male   | 6 |
| 9  | Turku | Urban  | Male   | 6 |
| 10 | Turku | Forest | Female | 5 |
| 10 | Turku | Forest | Female | 5 |
| 10 | Turku | Forest | Female | 6 |
| 10 | Turku | Forest | Female | 6 |
| 10 | Turku | Forest | Female | 6 |
| 10 | Turku | Forest | Female | 6 |
| 10 | Turku | Forest | Female | 6 |
| 10 | Turku | Forest | Female | 6 |
| 10 | Turku | Forest | Female | 6 |
| 10 | Turku | Forest | Female | 6 |
| 10 | Turku | Forest | Female | 6 |
| 10 | Turku | Forest | Female | 6 |
| 10 | Turku | Forest | Female | 6 |
| 10 | Turku | Forest | Female | 6 |
| 10 | Turku | Forest | Female | 6 |
| 10 | Turku | Forest | Female | 6 |
| 10 | Turku | Forest | Male   | 5 |
| 10 | Turku | Forest | Male   | 5 |
| 10 | Turku | Forest | Male   | 5 |
| 10 | Turku | Forest | Male   | 5 |
